# Supplementary material
Source: MDPI journal article supplement (https://www.mdpi.com/1999-4907/10/2/119)
Supplement: s1 [file s1]

Archive with 2 entries (2 files):
- forests-435046 Supplemental tables r2.pdf
- forests-435046-supplementary figures-r2.pdf
