# Supplementary material
Source: MDPI journal article supplement (https://www.mdpi.com/1999-4907/10/2/119)
Supplement: s1 [file s1 › forests-435046 Supplemental tables r2.pdf]

**Table S-1. Physiographic, topographic and soils information for ten plots at Cascade Head Experimental Forest.**

| <b>Plot</b> | <b>Area<br/>(ha)</b> | <b>Latitude</b> | <b>Longitude</b> | <b>Elev<br/>(m)</b> | <b>Slope<br/>(deg)</b> | <b>Aspect</b> | <b>Soil texture</b> | <b>Soil depth<br/>(B, m)</b> | <b>Parent material</b> |
|-------------|----------------------|-----------------|------------------|---------------------|------------------------|---------------|---------------------|------------------------------|------------------------|
| CH01        | 0.4048               | 45.0456         | -123.8973        | <b>298</b>          | <b>16</b>              | <b>S</b>      | silty clay loam     | 1.0-1.4                      | diorite, sandstone     |
| CH03        | 0.4048               | 45.0457         | -123.9040        | <b>236</b>          | <b>8</b>               | <b>W</b>      | silty clay loam     | 1.0-1.3+                     | sandstone, siltstone   |
| CH04        | 0.4048               | 45.0648         | -123.9413        | <b>294</b>          | <b>12</b>              | <b>SW</b>     | silty clay loam     | 1.3+                         | sandstone, siltstone   |
| CH05        | 0.4048               | 45.0653         | -123.9423        | <b>288</b>          | <b>9</b>               | <b>SW</b>     | silty clay loam     | 1.2+                         | sandstone, siltstone   |
| CH06*       | 0.4048               | 45.0615         | -123.9391        | <b>253</b>          | <b>14</b>              | <b>SW</b>     | silty clay loam     | 1.2+                         | sandstone, siltstone   |
| CH07        | 0.4048               | 45.0627         | -123.9398        | <b>277</b>          | <b>25</b>              | <b>S</b>      | silty clay loam     | 1.2+                         | sandstone, siltstone   |
| CH08        | 0.4048               | 45.0646         | -123.9453        | <b>252</b>          | <b>25</b>              | <b>S</b>      | silty clay          | 1.5+                         | sandstone, siltstone   |
| CH10        | 0.4048               | 45.0631         | -123.9917        | <b>312</b>          | <b>37</b>              | <b>NW</b>     | silty clay loam     | 0.9-1.3+                     | sandstone, siltstone   |
| CH12        | 0.4048               | 45.0500         | -123.9012        | <b>262</b>          | <b>4</b>               | <b>SW</b>     | silty clay loam     | 1.2-1.4+                     | sandstone, siltstone   |
| CH13*       | 0.4048               | 45.0513         | -123.9018        | <b>231</b>          | <b>19</b>              | <b>N</b>      | silty clay loam     | 1.2-1.4+                     | sandstone, siltstone   |

\* CH06 and CH13: soil information is from nearby plots (CH07 for CH06, CH12 for CH13).

**Table S-2. History of measurements and mortality assessments from ten, 0.4-ha plots at Cascade Head Experimental Forest.**

| Year | Activity                                                                             |
|------|--------------------------------------------------------------------------------------|
| 1935 | Plots established: plot boundaries surveyed, trees $\geq 5.0$ cm tagged and measured |
| 1940 | Tagged trees measured, mortality documented, ingrowth tagged and measured            |
| 1945 | Tagged trees measured, mortality documented, ingrowth tagged and measured            |
| 1955 | Tagged trees measured, mortality documented, ingrowth tagged and measured            |
| 1961 | Mortality assessment, dead trees noted                                               |
| 1968 | Tagged trees measured, mortality documented, ingrowth tagged and measured            |
| 1978 | Tagged trees measured, mortality documented, ingrowth tagged and measured            |
| 1983 | Tagged trees measured, mortality documented, ingrowth tagged and measured            |
| 1988 | Tagged trees measured, mortality documented, ingrowth tagged and measured            |
| 1993 | Tagged trees measured, mortality documented, ingrowth tagged and measured            |
| 1998 | Tagged trees measured, mortality documented, ingrowth tagged and measured            |
| 2003 | Tagged trees measured, mortality documented, ingrowth tagged and measured            |
| 2005 | Reconstruction of CH06: live and dead trees measured, trees cored and aged           |
| 2008 | Tagged trees measured, mortality documented, ingrowth tagged and measured            |
| 2013 | Tagged trees measured, mortality documented, ingrowth tagged and measured            |

**Table S-3 Plot level summaries.**

**Table S-3a. Plot-level data summary for CH01.**

| Plot | Year  | Interval | Ingrowth |                    | All live trees |                    | Mortality |                    | Mortality rate (%/yr) |                    | NPP <sup>1</sup><br>(Mg/ha/yr) |
|------|-------|----------|----------|--------------------|----------------|--------------------|-----------|--------------------|-----------------------|--------------------|--------------------------------|
|      |       |          | Trees/ha | Biomass<br>(Mg/ha) | Trees/ha       | Biomass<br>(Mg/ha) | Trees/ha  | Biomass<br>(Mg/ha) | Trees/ha              | Biomass<br>(Mg/ha) |                                |
| CH01 | 1935  |          |          |                    | 659.58         | 642.54             |           |                    |                       |                    |                                |
| CH01 | 1940  | 5        | 0.00     | 0.00               | 639.82         | 679.36             | 19.76     | 14.59              | 0.61                  | 0.46               | 10.28                          |
| CH01 | 1945  | 5        | 0.00     | 0.00               | 615.12         | 713.39             | 24.70     | 9.43               | 0.78                  | 0.28               | 8.69                           |
| CH01 | 1955  | 10       | 0.00     | 0.00               | 548.42         | 725.24             | 66.70     | 48.61              | 1.14                  | 0.70               | 6.05                           |
| CH01 | 1961* | 6        | 0.00     | 0.00               | 508.90         | 732.58             | 39.52     | 38.40              | 1.24                  | 0.90               | 7.62                           |
| CH01 | 1968  | 7        | 0.00     | 0.00               | 479.25         | 739.92             | 29.64     | 32.20              | 0.85                  | 0.64               | 5.65                           |
| CH01 | 1978  | 10       | 0.00     | 0.00               | 449.60         | 772.35             | 29.64     | 38.98              | 0.64                  | 0.54               | 7.14                           |
| CH01 | 1983  | 5        | 71.64    | 0.53               | 499.01         | 778.12             | 22.23     | 27.41              | 1.01                  | 0.72               | 6.64                           |
| CH01 | 1988  | 5        | 34.58    | 0.17               | 516.30         | 795.57             | 17.29     | 16.31              | 0.70                  | 0.42               | 6.75                           |
| CH01 | 1993  | 5        | 130.93   | 0.63               | 597.83         | 754.17             | 49.41     | 65.02              | 1.99                  | 1.69               | 4.72                           |
| CH01 | 1998  | 5        | 192.69   | 1.09               | 746.05         | 691.28             | 44.47     | 91.65              | 1.53                  | 2.56               | 5.75                           |
| CH01 | 2003  | 5        | 506.42   | 3.62               | 1156.13        | 548.93             | 96.34     | 171.02             | 2.73                  | 5.53               | 5.74                           |
| CH01 | 2008  | 5        | 466.90   | 5.66               | 1208.00        | 301.73             | 415.02    | 273.12             | 8.51                  | 12.86              | 5.18                           |
| CH01 | 2013  | 5        | 247.04   | 2.97               | 1333.99        | 252.26             | 121.05    | 95.40              | 2.09                  | 7.32               | 9.19                           |

1-Net Primary Productivity

**Table S-3b. Plot-level data summary for CH03.**

| Plot | Year | Interval | Ingrowth |                    | All live trees |                    | Mortality |                    | Mortality rate (%/yr) |                    | NPP<br>(Mg/ha/yr) |
|------|------|----------|----------|--------------------|----------------|--------------------|-----------|--------------------|-----------------------|--------------------|-------------------|
|      |      |          | Trees/ha | Biomass<br>(Mg/ha) | Trees/ha       | Biomass<br>(Mg/ha) | Trees/ha  | Biomass<br>(Mg/ha) | Trees/ha              | Biomass<br>(Mg/ha) |                   |
| CH03 | 1935 |          |          |                    | 412.55         | 661.37             |           |                    |                       |                    |                   |
| CH03 | 1940 | 5        | 0.00     | 0.00               | 382.91         | 678.78             | 29.64     | 20.56              | 1.48                  | 0.63               | 7.59              |
| CH03 | 1945 | 5        | 0.00     | 0.00               | 368.08         | 711.70             | 14.82     | 6.17               | 0.79                  | 0.18               | 7.82              |
| CH03 | 1955 | 10       | 0.00     | 0.00               | 335.97         | 750.57             | 32.11     | 24.63              | 0.91                  | 0.35               | 6.35              |
| CH03 | 1961 | 6        | 0.00     | 0.00               | 323.62         | 776.46             | 12.35     | 13.22              | 0.62                  | 0.30               | 6.52              |
| CH03 | 1968 | 7        | 0.00     | 0.00               | 306.32         | 802.35             | 17.29     | 20.14              | 0.78                  | 0.37               | 6.58              |
| CH03 | 1978 | 10       | 0.00     | 0.00               | 284.09         | 841.82             | 22.23     | 28.00              | 0.75                  | 0.35               | 6.75              |
| CH03 | 1983 | 5        | 17.29    | 0.10               | 279.15         | 841.32             | 22.23     | 34.27              | 1.62                  | 0.83               | 6.75              |
| CH03 | 1988 | 5        | 37.06    | 0.22               | 306.32         | 860.73             | 9.88      | 11.11              | 0.72                  | 0.27               | 6.10              |
| CH03 | 1993 | 5        | 22.23    | 0.11               | 301.38         | 860.35             | 27.17     | 34.07              | 1.84                  | 0.80               | 6.74              |
| CH03 | 1998 | 5        | 37.06    | 0.17               | 321.15         | 861.71             | 17.29     | 23.57              | 1.17                  | 0.55               | 4.99              |
| CH03 | 2003 | 5        | 42.00    | 0.26               | 321.15         | 800.89             | 42.00     | 94.22              | 2.76                  | 2.29               | 6.68              |
| CH03 | 2008 | 5        | 86.46    | 0.52               | 370.55         | 696.04             | 37.06     | 129.73             | 2.42                  | 3.47               | 4.98              |
| CH03 | 2013 | 5        | 101.28   | 0.69               | 442.19         | 673.03             | 29.64     | 52.92              | 1.65                  | 1.57               | 5.98              |

**Table S-3c. Plot-level data summary for CH04.**

| Plot | Year | Interval | Ingrowth |                    | All live trees |                    | Mortality |                    | Mortality rate (%/yr) |                    | NPP<br>(Mg/ha/yr) |
|------|------|----------|----------|--------------------|----------------|--------------------|-----------|--------------------|-----------------------|--------------------|-------------------|
|      |      |          | Trees/ha | Biomass<br>(Mg/ha) | Trees/ha       | Biomass<br>(Mg/ha) | Trees/ha  | Biomass<br>(Mg/ha) | Trees/ha              | Biomass<br>(Mg/ha) |                   |
| CH04 | 1935 |          |          |                    | 474.31         | 643.78             |           |                    |                       |                    |                   |
| CH04 | 1940 | 5        | 0.00     | 0.00               | 464.43         | 682.66             | 9.88      | 5.94               | 0.42                  | 0.19               | 8.96              |
| CH04 | 1945 | 5        | 0.00     | 0.00               | 459.49         | 717.02             | 4.94      | 1.74               | 0.21                  | 0.05               | 7.22              |
| CH04 | 1955 | 10       | 0.00     | 0.00               | 442.19         | 778.78             | 17.29     | 11.95              | 0.38                  | 0.17               | 7.37              |
| CH04 | 1961 | 6        | 0.00     | 0.00               | 424.90         | 815.02             | 17.29     | 10.38              | 0.66                  | 0.22               | 7.77              |
| CH04 | 1968 | 7        | 0.00     | 0.00               | 400.20         | 851.27             | 24.70     | 12.53              | 0.85                  | 0.22               | 6.97              |
| CH04 | 1978 | 10       | 0.00     | 0.00               | 387.85         | 905.45             | 12.35     | 19.85              | 0.31                  | 0.24               | 7.40              |
| CH04 | 1983 | 5        | 133.40   | 1.31               | 484.19         | 873.27             | 37.06     | 68.34              | 1.99                  | 1.56               | 7.23              |
| CH04 | 1988 | 5        | 98.81    | 0.53               | 568.18         | 897.64             | 14.82     | 11.21              | 0.62                  | 0.26               | 7.12              |
| CH04 | 1993 | 5        | 106.23   | 0.55               | 659.58         | 894.70             | 14.82     | 28.78              | 0.53                  | 0.65               | 5.17              |
| CH04 | 1998 | 5        | 177.87   | 0.83               | 810.28         | 908.60             | 27.17     | 14.84              | 0.84                  | 0.33               | 5.75              |
| CH04 | 2003 | 5        | 106.23   | 0.51               | 889.33         | 927.90             | 27.17     | 24.81              | 0.68                  | 0.55               | 8.82              |
| CH04 | 2008 | 5        | 214.92   | 1.17               | 1067.19        | 934.17             | 37.06     | 26.57              | 0.85                  | 0.58               | 6.57              |
| CH04 | 2013 | 5        | 140.81   | 0.74               | 1141.30        | 913.07             | 66.70     | 46.72              | 1.28                  | 1.02               | 5.12              |

**Table S-3d. Plot-level data summary for CH05.**

| Plot | Year | Interval | Ingrowth |                    | All live trees |                    | Mortality |                    | Mortality rate (%/yr) |                    | NPP<br>(Mg/ha/yr) |
|------|------|----------|----------|--------------------|----------------|--------------------|-----------|--------------------|-----------------------|--------------------|-------------------|
|      |      |          | Trees/ha | Biomass<br>(Mg/ha) | Trees/ha       | Biomass<br>(Mg/ha) | Trees/ha  | Biomass<br>(Mg/ha) | Trees/ha              | Biomass<br>(Mg/ha) |                   |
| CH05 | 1935 |          |          |                    | 373.02         | 762.63             |           |                    |                       |                    |                   |
| CH05 | 1940 | 5        | 0.00     | 0.00               | 368.08         | 791.90             | 4.94      | 9.04               | 0.27                  | 0.24               | 7.66              |
| CH05 | 1945 | 5        | 0.00     | 0.00               | 360.67         | 814.60             | 7.41      | 11.06              | 0.41                  | 0.28               | 6.75              |
| CH05 | 1955 | 10       | 0.00     | 0.00               | 323.62         | 830.05             | 37.06     | 60.64              | 1.08                  | 0.77               | 7.61              |
| CH05 | 1961 | 6        | 0.00     | 0.00               | 316.21         | 844.61             | 7.41      | 5.53               | 0.39                  | 0.11               | 3.35              |
| CH05 | 1968 | 7        | 0.00     | 0.00               | 293.97         | 859.17             | 22.23     | 54.85              | 1.04                  | 0.95               | 9.92              |
| CH05 | 1978 | 10       | 0.00     | 0.00               | 271.74         | 890.19             | 22.23     | 43.81              | 0.78                  | 0.52               | 7.48              |
| CH05 | 1983 | 5        | 750.99   | 7.86               | 998.02         | 870.65             | 24.70     | 65.47              | 1.89                  | 1.52               | 9.19              |
| CH05 | 1988 | 5        | 74.11    | 0.41               | 1042.49        | 900.14             | 29.64     | 4.78               | 0.60                  | 0.11               | 6.85              |
| CH05 | 1993 | 5        | 116.11   | 0.65               | 1114.13        | 937.58             | 44.47     | 4.12               | 0.87                  | 0.09               | 8.31              |
| CH05 | 1998 | 5        | 49.41    | 0.31               | 1091.90        | 967.20             | 71.64     | 0.54               | 1.32                  | 0.01               | 6.03              |
| CH05 | 2003 | 5        | 27.17    | 0.11               | 1040.02        | 995.84             | 79.05     | 12.84              | 1.49                  | 0.27               | 8.29              |
| CH05 | 2008 | 5        | 12.35    | 0.08               | 963.44         | 1002.59            | 88.93     | 32.30              | 1.77                  | 0.66               | 7.81              |
| CH05 | 2013 | 5        | 2.47     | 0.01               | 872.04         | 961.66             | 93.87     | 79.07              | 2.03                  | 1.63               | 7.63              |

**Table S-3e. Plot-level data summary for CH06.**

| Plot | Year | Interval | Ingrowth |                    | All live trees |                    | Mortality |                    | Mortality rate (%/yr) |                    | NPP<br>(Mg/ha/yr) |
|------|------|----------|----------|--------------------|----------------|--------------------|-----------|--------------------|-----------------------|--------------------|-------------------|
|      |      |          | Trees/ha | Biomass<br>(Mg/ha) | Trees/ha       | Biomass<br>(Mg/ha) | Trees/ha  | Biomass<br>(Mg/ha) | Trees/ha              | Biomass<br>(Mg/ha) |                   |
| CH06 | 1935 |          |          |                    | 511.36         | 619.04             |           |                    |                       |                    |                   |
| CH06 | 1940 | 5        | 0.00     | 0.00               | 484.19         | 654.31             | 27.17     | 8.77               | 1.09                  | 0.29               | 8.81              |
| CH06 | 1945 | 5        | 0.00     | 0.00               | 461.96         | 684.09             | 22.23     | 10.30              | 0.94                  | 0.32               | 8.02              |
| CH06 | 1955 | 10       | 0.00     | 0.00               | 442.19         | 739.56             | 19.76     | 8.83               | 0.44                  | 0.13               | 6.43              |
| CH06 | 1961 | 6        | 0.00     | 0.00               | 429.84         | 749.00             | 12.35     | 44.53              | 0.47                  | 1.03               | 9.00              |
| CH06 | 1968 | 7        | 0.00     | 0.00               | 37.07          | 90.84              | 392.78    | 629.10             | 29.54                 | 23.03              | 0.00              |
| CH06 | 1978 | 10       | 574.72   | 0.36               | 609.27         | 99.35              | 2.47      | 4.49               | 0.69                  | 0.51               | 1.30              |
| CH06 | 1983 | 5        | 1684.54  | 1.74               | 2291.37        | 116.19             | 2.47      | 8.10               | 0.08                  | 1.69               | 4.99              |
| CH06 | 1988 | 5        | 394.41   | 0.57               | 2688.15        | 161.75             | 2.47      | 1.30               | 0.02                  | 0.23               | 9.37              |
| CH06 | 1993 | 5        | 7.41     | 0.01               | 2157.99        | 214.40             | 537.47    | 13.85              | 4.36                  | 1.77               | 13.30             |
| CH06 | 1998 | 5        | 7.41     | 0.00               | 1654.11        | 243.32             | 511.29    | 40.41              | 5.26                  | 4.09               | 13.87             |
| CH06 | 2003 | 5        | 0.00     | 0.00               | 1118.91        | 294.03             | 535.10    | 21.02              | 7.52                  | 1.79               | 14.35             |
| CH06 | 2008 | 5        | 4.94     | 1.77               | 1037.55        | 342.13             | 86.46     | 7.32               | 1.60                  | 0.50               | 11.09             |
| CH06 | 2013 | 5        | 0.00     | 0.00               | 864.62         | 360.75             | 172.92    | 23.95              | 3.58                  | 1.44               | 8.51              |

**Table S-3f. Plot-level data summary for CH07.**

| Plot | Year | Interval | Ingrowth |                    | All live trees |                    | Mortality |                    | Mortality rate (%/yr) |                    | NPP<br>(Mg/ha/yr) |
|------|------|----------|----------|--------------------|----------------|--------------------|-----------|--------------------|-----------------------|--------------------|-------------------|
|      |      |          | Trees/ha | Biomass<br>(Mg/ha) | Trees/ha       | Biomass<br>(Mg/ha) | Trees/ha  | Biomass<br>(Mg/ha) | Trees/ha              | Biomass<br>(Mg/ha) |                   |
| CH07 | 1935 |          |          |                    | 629.94         | 650.22             |           |                    |                       |                    |                   |
| CH07 | 1940 | 5        | 0.00     | 0.00               | 615.12         | 689.18             | 14.82     | 4.13               | 0.48                  | 0.13               | 8.62              |
| CH07 | 1945 | 5        | 0.00     | 0.00               | 590.42         | 704.24             | 24.70     | 15.30              | 0.82                  | 0.45               | 6.07              |
| CH07 | 1955 | 10       | 0.00     | 0.00               | 570.65         | 763.51             | 19.76     | 10.42              | 0.34                  | 0.15               | 6.97              |
| CH07 | 1961 | 6        | 0.00     | 0.00               | 531.13         | 779.73             | 39.52     | 25.29              | 1.19                  | 0.56               | 6.92              |
| CH07 | 1968 | 7        | 0.00     | 0.00               | 499.01         | 795.94             | 32.11     | 24.71              | 0.89                  | 0.46               | 5.85              |
| CH07 | 1978 | 10       | 0.00     | 0.00               | 464.43         | 830.16             | 34.58     | 34.70              | 0.72                  | 0.44               | 6.89              |
| CH07 | 1983 | 5        | 106.23   | 0.66               | 533.60         | 801.86             | 37.06     | 55.83              | 1.65                  | 1.38               | 5.51              |
| CH07 | 1988 | 5        | 34.58    | 0.25               | 543.48         | 798.12             | 24.70     | 34.91              | 0.94                  | 0.89               | 6.23              |
| CH07 | 1993 | 5        | 123.52   | 0.61               | 652.17         | 816.10             | 14.82     | 16.09              | 0.55                  | 0.41               | 6.82              |
| CH07 | 1998 | 5        | 93.87    | 0.68               | 701.58         | 770.53             | 44.47     | 71.71              | 1.40                  | 1.82               | 5.23              |
| CH07 | 2003 | 5        | 400.20   | 2.81               | 1044.96        | 739.15             | 56.82     | 67.96              | 1.67                  | 1.83               | 7.32              |
| CH07 | 2008 | 5        | 256.92   | 1.81               | 1173.42        | 631.28             | 128.46    | 144.62             | 2.59                  | 4.26               | 7.35              |
| CH07 | 2013 | 5        | 145.75   | 0.88               | 1242.59        | 628.14             | 76.58     | 41.54              | 1.34                  | 1.35               | 7.68              |

**Table S-3g. Plot-level data summary for CH08.**

| Plot | Year | Interval | Ingrowth |                 | All live trees |                 | Mortality |                 | Mortality rate (%) |                 | NPP  |
|------|------|----------|----------|-----------------|----------------|-----------------|-----------|-----------------|--------------------|-----------------|------|
|      |      |          | Trees/ha | Biomass (Mg/ha) | Trees/ha       | Biomass (Mg/ha) | Trees/ha  | Biomass (Mg/ha) | Trees/ha           | Biomass (Mg/ha) |      |
| CH08 | 1935 |          |          |                 | 884.39         | 624.25          |           |                 |                    |                 |      |
| CH08 | 1940 | 5        | 0.00     | 0.00            | 827.57         | 647.30          | 56.82     | 24.06           | 1.32               | 0.78            | 9.42 |
| CH08 | 1945 | 5        | 0.00     | 0.00            | 795.45         | 676.88          | 32.11     | 12.35           | 0.79               | 0.38            | 8.39 |
| CH08 | 1955 | 10       | 0.00     | 0.00            | 711.46         | 700.64          | 83.99     | 40.11           | 1.11               | 0.61            | 6.39 |
| CH08 | 1961 | 6        | 0.00     | 0.00            | 694.17         | 724.69          | 17.29     | 7.01            | 0.41               | 0.17            | 5.18 |
| CH08 | 1968 | 7        | 0.00     | 0.00            | 647.23         | 748.75          | 46.93     | 33.12           | 1.00               | 0.67            | 8.17 |
| CH08 | 1978 | 10       | 0.00     | 0.00            | 573.12         | 768.23          | 74.11     | 56.11           | 1.21               | 0.78            | 7.56 |
| CH08 | 1983 | 5        | 316.21   | 2.70            | 842.39         | 738.55          | 46.94     | 61.66           | 1.69               | 1.66            | 6.40 |
| CH08 | 1988 | 5        | 264.33   | 1.45            | 1074.60        | 750.20          | 32.11     | 25.28           | 0.77               | 0.69            | 7.39 |
| CH08 | 1993 | 5        | 148.22   | 0.84            | 1136.36        | 732.60          | 86.46     | 58.32           | 1.66               | 1.61            | 8.14 |
| CH08 | 1998 | 5        | 160.57   | 0.98            | 1205.53        | 662.71          | 91.40     | 98.01           | 1.66               | 2.83            | 5.62 |
| CH08 | 2003 | 5        | 301.38   | 2.08            | 1200.59        | 421.62          | 306.32    | 269.33          | 5.69               | 9.91            | 5.65 |
| CH08 | 2008 | 5        | 254.45   | 2.09            | 1188.24        | 174.70          | 266.80    | 278.44          | 4.90               | 19.43           | 6.31 |
| CH08 | 2013 | 5        | 192.69   | 2.22            | 1254.94        | 185.41          | 125.99    | 38.18           | 2.22               | 4.81            | 9.78 |

**Table S-3h. Plot-level data summary for CH10.**

| Plot | Year | Interval | Ingrowth |                    | All live trees |                    | Mortality |                    | Mortality rate (%/yr) |                    | NPP<br>(Mg/ha/yr) |
|------|------|----------|----------|--------------------|----------------|--------------------|-----------|--------------------|-----------------------|--------------------|-------------------|
|      |      |          | Trees/ha | Biomass<br>(Mg/ha) | Trees/ha       | Biomass<br>(Mg/ha) | Trees/ha  | Biomass<br>(Mg/ha) | Trees/ha              | Biomass<br>(Mg/ha) |                   |
| CH10 | 1935 |          |          |                    | 400.20         | 676.50             |           |                    |                       |                    |                   |
| CH10 | 1940 | 5        | 0.00     | 0.00               | 365.61         | 699.94             | 34.58     | 20.95              | 1.79                  | 0.63               | 8.88              |
| CH10 | 1945 | 5        | 0.00     | 0.00               | 363.14         | 737.69             | 4.94      | 4.68               | 0.27                  | 0.13               | 8.49              |
| CH10 | 1955 | 10       | 0.00     | 0.00               | 321.15         | 774.34             | 42.00     | 36.11              | 1.22                  | 0.50               | 7.28              |
| CH10 | 1961 | 6        | 0.00     | 0.00               | 296.45         | 796.12             | 24.70     | 11.53              | 1.32                  | 0.25               | 5.55              |
| CH10 | 1968 | 7        | 0.00     | 0.00               | 269.27         | 817.89             | 27.17     | 34.98              | 1.36                  | 0.64               | 8.11              |
| CH10 | 1978 | 10       | 0.00     | 0.00               | 244.57         | 850.05             | 24.70     | 30.16              | 0.96                  | 0.37               | 6.23              |
| CH10 | 1983 | 5        | 0.00     | 0.00               | 237.15         | 868.83             | 7.41      | 8.78               | 0.61                  | 0.21               | 5.51              |
| CH10 | 1988 | 5        | 0.00     | 0.00               | 202.57         | 868.81             | 34.58     | 34.27              | 3.10                  | 0.80               | 6.85              |
| CH10 | 1993 | 5        | 79.05    | 0.87               | 264.33         | 862.33             | 17.29     | 31.86              | 1.77                  | 0.74               | 5.08              |
| CH10 | 1998 | 5        | 145.75   | 1.77               | 400.20         | 861.79             | 9.88      | 31.93              | 0.76                  | 0.75               | 6.28              |
| CH10 | 2003 | 5        | 150.69   | 1.54               | 538.54         | 892.08             | 12.35     | 5.03               | 0.63                  | 0.12               | 7.06              |
| CH10 | 2008 | 5        | 205.04   | 2.16               | 701.58         | 883.11             | 42.00     | 43.97              | 1.61                  | 1.01               | 7.00              |
| CH10 | 2013 | 5        | 229.74   | 2.37               | 864.62         | 918.31             | 66.70     | 15.31              | 1.98                  | 0.35               | 10.10             |

**Table S-3i. Plot-level data summary for CH12.**

| Plot | Year | Interval | Ingrowth |                    | All live trees |                    | Mortality |                    | Mortality rate (%/yr) |                    | NPP<br>(Mg/ha/yr) |
|------|------|----------|----------|--------------------|----------------|--------------------|-----------|--------------------|-----------------------|--------------------|-------------------|
|      |      |          | Trees/ha | Biomass<br>(Mg/ha) | Trees/ha       | Biomass<br>(Mg/ha) | Trees/ha  | Biomass<br>(Mg/ha) | Trees/ha              | Biomass<br>(Mg/ha) |                   |
| CH12 | 1935 |          |          |                    | 491.60         | 552.87             |           |                    |                       |                    |                   |
| CH12 | 1940 | 5        | 0.00     | 0.00               | 484.19         | 598.56             | 7.41      | 2.74               | 0.30                  | 0.10               | 9.69              |
| CH12 | 1945 | 5        | 0.00     | 0.00               | 454.55         | 613.16             | 29.64     | 23.73              | 1.26                  | 0.81               | 7.66              |
| CH12 | 1955 | 10       | 0.00     | 0.00               | 432.31         | 679.25             | 22.23     | 12.74              | 0.50                  | 0.21               | 7.88              |
| CH12 | 1961 | 6        | 0.00     | 0.00               | 410.08         | 712.22             | 22.23     | 15.82              | 0.88                  | 0.39               | 8.13              |
| CH12 | 1968 | 7        | 0.00     | 0.00               | 392.79         | 745.18             | 17.29     | 10.94              | 0.61                  | 0.22               | 6.27              |
| CH12 | 1978 | 10       | 0.00     | 0.00               | 335.97         | 724.69             | 56.82     | 77.07              | 1.55                  | 1.09               | 5.66              |
| CH12 | 1983 | 5        | 296.44   | 2.34               | 607.71         | 724.14             | 24.70     | 35.75              | 1.52                  | 1.01               | 7.04              |
| CH12 | 1988 | 5        | 145.75   | 0.89               | 723.81         | 716.47             | 29.64     | 45.32              | 1.00                  | 1.28               | 7.53              |
| CH12 | 1993 | 5        | 185.28   | 1.04               | 854.74         | 722.87             | 54.35     | 37.38              | 1.55                  | 1.07               | 8.76              |
| CH12 | 1998 | 5        | 42.00    | 0.24               | 802.87         | 727.40             | 93.87     | 28.47              | 2.30                  | 0.80               | 6.60              |
| CH12 | 2003 | 5        | 76.58    | 0.42               | 807.81         | 696.16             | 71.64     | 79.85              | 1.85                  | 2.30               | 9.72              |
| CH12 | 2008 | 5        | 24.70    | 0.26               | 671.94         | 521.92             | 160.57    | 208.50             | 4.34                  | 6.87               | 6.85              |
| CH12 | 2013 | 5        | 29.64    | 0.21               | 644.76         | 494.68             | 56.82     | 69.90              | 1.75                  | 2.83               | 8.53              |

**Table S-3j. Plot-level data summary for CH13.**

| Plot | Year | Interval | Ingrowth |                    | All live trees |                    | Mortality |                    | Mortality rate (%/yr) |                    | NPP<br>(Mg/ha/yr) |
|------|------|----------|----------|--------------------|----------------|--------------------|-----------|--------------------|-----------------------|--------------------|-------------------|
|      |      |          | Trees/ha | Biomass<br>(Mg/ha) | Trees/ha       | Biomass<br>(Mg/ha) | Trees/ha  | Biomass<br>(Mg/ha) | Trees/ha              | Biomass<br>(Mg/ha) |                   |
| CH13 | 1935 |          |          |                    | 538.54         | 517.05             |           |                    |                       |                    |                   |
| CH13 | 1940 | 5        | 0.00     | 0.00               | 526.19         | 555.06             | 12.35     | 7.44               | 0.46                  | 0.29               | 9.09              |
| CH13 | 1945 | 5        | 0.00     | 0.00               | 506.42         | 581.29             | 19.76     | 12.21              | 0.76                  | 0.44               | 7.69              |
| CH13 | 1955 | 10       | 0.00     | 0.00               | 447.13         | 613.50             | 59.29     | 40.20              | 1.24                  | 0.71               | 7.24              |
| CH13 | 1961 | 6        | 0.00     | 0.00               | 407.61         | 632.97             | 39.52     | 35.30              | 1.53                  | 0.98               | 9.13              |
| CH13 | 1968 | 7        | 0.00     | 0.00               | 392.79         | 652.43             | 14.82     | 8.60               | 0.53                  | 0.20               | 4.01              |
| CH13 | 1978 | 10       | 0.00     | 0.00               | 274.21         | 538.88             | 118.58    | 165.13             | 3.53                  | 2.88               | 5.16              |
| CH13 | 1983 | 5        | 491.60   | 4.75               | 699.11         | 463.27             | 66.70     | 106.71             | 5.42                  | 4.32               | 6.22              |
| CH13 | 1988 | 5        | 187.75   | 1.68               | 854.74         | 456.76             | 32.11     | 45.76              | 0.94                  | 2.06               | 7.85              |
| CH13 | 1993 | 5        | 217.39   | 1.64               | 1022.73        | 480.15             | 49.41     | 9.41               | 1.18                  | 0.42               | 6.56              |
| CH13 | 1998 | 5        | 51.88    | 0.78               | 956.03         | 486.43             | 118.58    | 31.94              | 2.43                  | 1.37               | 7.64              |
| CH13 | 2003 | 5        | 42.00    | 0.26               | 862.15         | 512.92             | 135.87    | 19.14              | 3.02                  | 0.80               | 9.13              |
| CH13 | 2008 | 5        | 4.94     | 0.04               | 696.64         | 477.33             | 170.45    | 77.69              | 4.31                  | 3.23               | 8.42              |
| CH13 | 2013 | 5        | 17.29    | 0.08               | 615.12         | 511.90             | 98.81     | 23.20              | 3.01                  | 0.99               | 11.55             |

**Table S-4. Means (standard deviations) of data from 10 plots at Cascade Head Experimental Forest** (*continued on next page*).

| Year | Interval | Ingrowth           |                    | All live trees     |                    | Mortality         |                    | Mortality rate<br>(%/yr) |                    | NPP<br>(Mg/ha/yr) |
|------|----------|--------------------|--------------------|--------------------|--------------------|-------------------|--------------------|--------------------------|--------------------|-------------------|
|      |          | Trees/ha           | Biomass<br>(Mg/ha) | Trees/ha           | Biomass<br>(Mg/ha) | Trees/ha          | Biomass<br>(Mg/ha) | Trees/ha                 | Biomass<br>(Mg/ha) |                   |
| 1935 |          |                    |                    | 537.55<br>(153.51) | 635.02<br>(66.75)  |                   |                    |                          |                    |                   |
| 1940 | 5        | 0                  | 0                  | 515.81<br>(145)    | 667.71<br>(62.78)  | 21.74<br>(15.83)  | 11.82<br>(7.67)    | 0.82<br>(0.55)           | 0.37<br>(0.24)     | 8.90 (0.83)       |
| 1945 | 5        | 0                  | 0                  | 497.53<br>(137.19) | 695.41<br>(64.45)  | 18.53<br>(10.03)  | 10.70<br>(6.1)     | 0.70<br>(0.32)           | 0.33<br>(0.21)     | 7.68 (0.81)       |
| 1955 | 10       | 0                  | 0                  | 457.51<br>(123.86) | 735.54<br>(60.29)  | 40.02<br>(22.96)  | 29.42<br>(18.29)   | 0.84<br>(0.38)           | 0.43<br>(0.26)     | 6.96 (0.62)       |
| 1961 | 6        | 0                  | 0                  | 434.29<br>(119.76) | 756.34<br>(60.14)  | 23.22<br>(12.28)  | 20.70<br>(14.16)   | 0.87<br>(0.42)           | 0.49<br>(0.35)     | 6.92 (1.82)       |
| 1968 | 7        | 0                  | 0                  | 371.79<br>(162.68) | 710.38<br>(226.1)  | 62.50<br>(116.42) | 86.12<br>(191.29)  | 3.74<br>(9.07)           | 2.74<br>(7.13)     | 5.74 (3.83)       |
| 1978 | 10       | 57.47<br>(181.74)  | 0.04<br>(0.11)     | 389.48<br>(130.55) | 722.12<br>(242.74) | 39.77<br>(34.63)  | 49.83<br>(45.06)   | 1.11<br>(0.91)           | 0.77<br>(0.78)     | 6.16 (1.88)       |
| 1983 | 5        | 386.83<br>(513.08) | 2.20<br>(2.46)     | 747.17<br>(590.09) | 707.62<br>(240.94) | 29.15<br>(18.77)  | 47.23<br>(30.37)   | 1.75<br>(1.42)           | 1.49<br>(1.10)     | 6.55 (1.18)       |
| 1988 | 5        | 127.14<br>(124.41) | 0.62<br>(0.56)     | 852.07<br>(705.67) | 720.62<br>(235.62) | 22.73<br>(10.97)  | 23.03<br>(16.39)   | 0.94<br>(0.81)           | 0.7 (0.6)          | 7.20 (0.94)       |
| 1993 | 5        | 113.64<br>(65.31)  | 0.70<br>(0.46)     | 876.13<br>(544.53) | 727.53<br>(221.36) | 89.57<br>(158.96) | 29.89<br>(20.14)   | 1.63<br>(1.10)           | 0.92<br>(0.59)     | 7.36 (2.52)       |

|      |   |                    |                |                    |                    |                    |                    |                |                |             |
|------|---|--------------------|----------------|--------------------|--------------------|--------------------|--------------------|----------------|----------------|-------------|
| 1998 | 5 | 95.85<br>(67.54)   | 0.69<br>(0.53) | 868.97<br>(388.42) | 718.10<br>(217.39) | 103.01<br>(147.86) | 43.31<br>(32.75)   | 1.87<br>(1.31) | 1.51<br>(1.30) | 6.78 (2.6)  |
| 2003 | 5 | 165.27<br>(175.89) | 1.16<br>(1.28) | 897.96<br>(282.89) | 682.95<br>(232.21) | 136.27<br>(163.12) | 76.52<br>(84.80)   | 2.80<br>(2.21) | 2.54<br>(3.03) | 8.28 (2.54) |
| 2008 | 5 | 153.16<br>(153.00) | 1.56<br>(1.67) | 907.86<br>(282.06) | 596.50<br>(283.13) | 143.28<br>(119.89) | 122.23<br>(102.05) | 3.29<br>(2.29) | 5.29<br>(6.26) | 7.16 (1.74) |
| 2013 | 5 | 110.67<br>(94.85)  | 1.02<br>(1.10) | 927.62<br>(305.77) | 589.92<br>(279.71) | 90.91<br>(41.14)   | 48.62<br>(26.06)   | 2.09<br>(0.72) | 2.33<br>(2.15) | 8.41 (1.92) |
